# Supplementary material for: Performance of General Surgical Procedures in Outpatient Settings Before and After Onset of the COVID-19 Pandemic
Source: PubMed Central journal article supplement (PMC9982689; doi:10.1001/jamanetworkopen.2023.1198), 2023-03-02
Supplement: jamanetwopen-e231198-s001.pdf [file jamanetwopen-e231198-s001.pdf]

## Supplementary Online Content

Shariq OA, Bews KA, Etzioni DA, Kendrick ML, Habermann EB, Thiels CA.  
Performance of general surgical procedures in outpatient settings before and after onset  
of the COVID-19 pandemic. *JAMA Netw Open*. 2023;6(3):e231198.  
doi:10.1001/jamanetworkopen.2023.1198

**eFigure.** Time Trends of Operations Without a Clinically Meaningful ( $\geq 10\%$ ) Increase in  
the Proportion of Outpatient Procedures Over the Study Period (2016-2020)

**eTable 1.** CPT, ICD-9-CM, and ICD-10-CM Codes Used to Identify Patients

**eTable 2.** Sensitivity Analysis of Odds of Undergoing Outpatient General Surgery  
Procedures During Q2-Q4 of 2020 vs Q2-Q4 of 2019

This supplementary material has been provided by the authors to give readers additional  
information about their work.

**eFigure.** Time Trends of Operations Without a Clinically Meaningful ( $\geq 10\%$ ) Increase in the Proportion of Outpatient Procedures Over the Study Period (2016-2020)

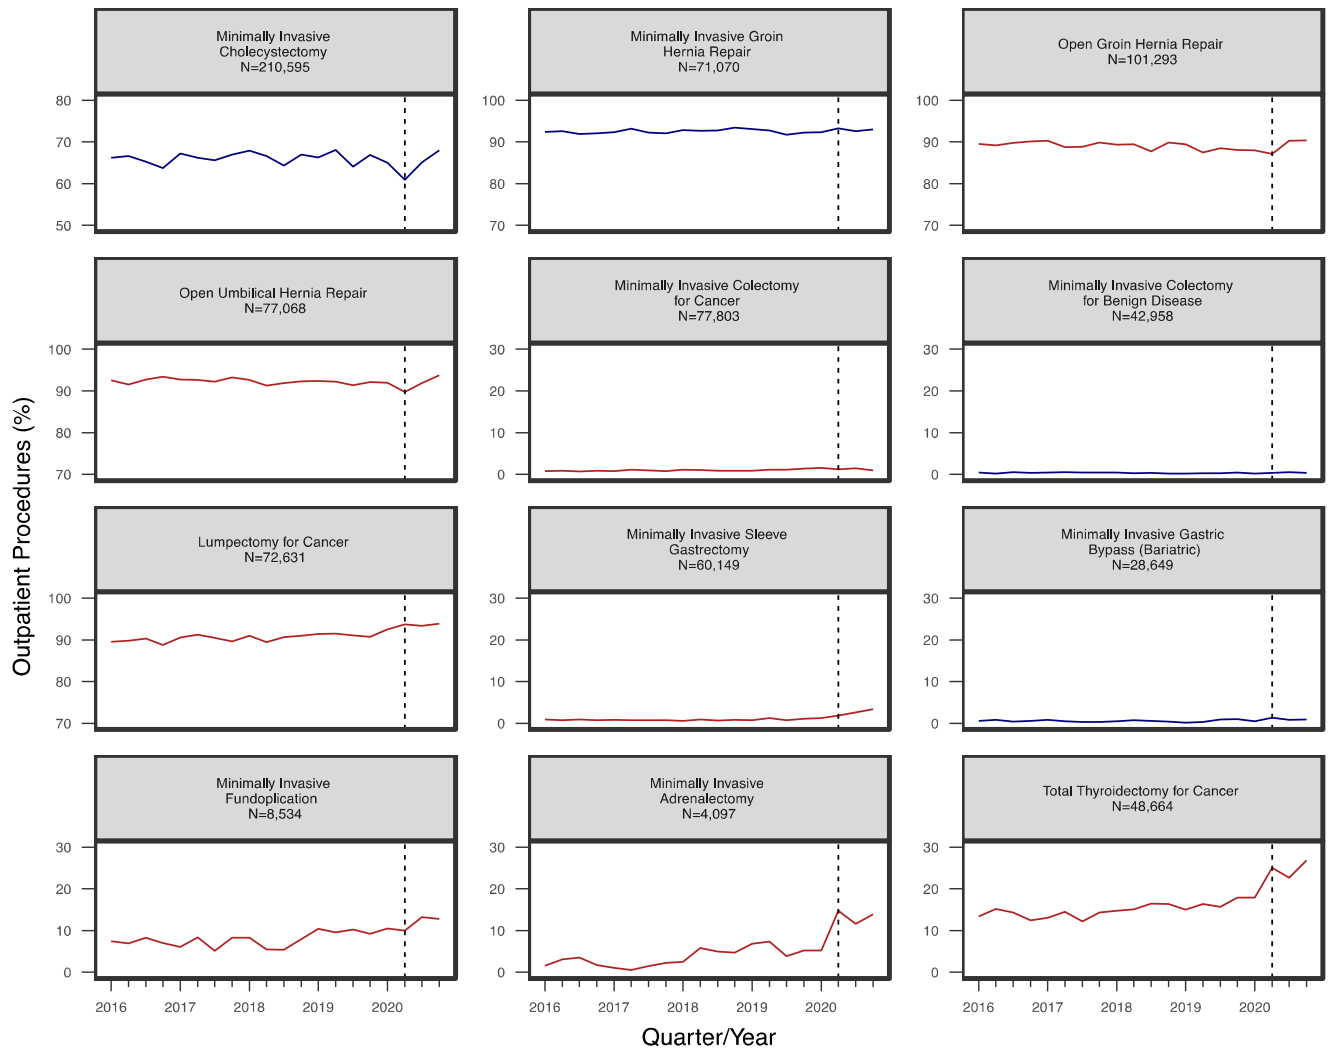

Red and blue lines indicate significant ( $P < 0.05$ ) and non-significant ( $P \geq 0.05$ ) trends over time, respectively, as determined by Cochran-Armitage tests. The vertical dotted line represents quarter 2 of 2020 (the onset of the COVID-19 pandemic in the United States).

**eTable 1.** CPT, ICD-9-CM, and ICD-10-CM Codes Used to Identify Patients

| <b>Procedure</b>                                | <b>CPT codes</b>                                              | <b>ICD-9-CM codes*</b>                                                                                                                                                                                                                                 | <b>ICD-10-CM codes</b>                                                                                                                                                                                                                                                                                                                                                    |
|-------------------------------------------------|---------------------------------------------------------------|--------------------------------------------------------------------------------------------------------------------------------------------------------------------------------------------------------------------------------------------------------|---------------------------------------------------------------------------------------------------------------------------------------------------------------------------------------------------------------------------------------------------------------------------------------------------------------------------------------------------------------------------|
| Minimally invasive colectomy for cancer         | 44204, 44205, 44206, 44207, 44208                             | 153, 171.5, 195.2, 197.5, 197.6, 198.89, 199.1, 209.1, 209.11, 209.12, 209.13, 209.14, 209.15, 209.16, 209.17, 209.20, 209.27, 209.30, 209.5, 209.51, 209.52, 209.53, 209.54, 209.55, 209.56, 209.57, 209.60, 230.3, 230.4, 235.2, 235.5, 238.9, 239.0 | C7A.00, C7A.02, C7A.020, C7A.021, C7A.022, C7A.023, C7A.024, C7A.025, C7A.026, C7A.029, C7A.096, C7A.1, C7A.8, C18, C18.x, C19.x, C20.x, C21.x, C49.A0, C49.A4, C49.A5, C76.2, C78.5, C78.6, C79.89, C80.1, D01.0, D01.1, D01.2, D3A.00, D3A.020, D3A.021, D3A.022, D3A.023, D3A.024, D3A.025, D3A.026, D3A.029, D3A.096, D12.x, D37.3, D37.4, D37.5, D37.9, D48.9, D49.0 |
| Minimally invasive colectomy for benign disease | 44204, 44205, 44206, 44207, 44208                             |                                                                                                                                                                                                                                                        | K50.x, K51.x, K52.x, K57.x, K58.x, K59.x                                                                                                                                                                                                                                                                                                                                  |
| Lumpectomy for breast cancer                    | 19301, 19302                                                  |                                                                                                                                                                                                                                                        | C50.x, D05.x                                                                                                                                                                                                                                                                                                                                                              |
| Mastectomy for breast cancer                    | 19303, 19305, 19306, 19307                                    |                                                                                                                                                                                                                                                        | C50.x, D05.x                                                                                                                                                                                                                                                                                                                                                              |
| Minimally invasive inguinal hernia repair       | 49650, 49651, 49659                                           |                                                                                                                                                                                                                                                        | K40.x, K41.x                                                                                                                                                                                                                                                                                                                                                              |
| Open inguinal hernia repair                     | 49507, 49520, 49521, 49525, 49505, 49550, 49553, 49555, 49557 |                                                                                                                                                                                                                                                        | K40.x, K41.x                                                                                                                                                                                                                                                                                                                                                              |
| Minimally invasive ventral hernia repair        | 49652, 49653, 49654, 49655, 49656, 49657                      |                                                                                                                                                                                                                                                        | K42.x, K43.x, K46.x                                                                                                                                                                                                                                                                                                                                                       |
| Open umbilical hernia repair                    | 49585, 49587                                                  |                                                                                                                                                                                                                                                        | K42.x                                                                                                                                                                                                                                                                                                                                                                     |
| Minimally invasive sleeve gastrectomy           | 43775                                                         | 278, 278.01                                                                                                                                                                                                                                            | E66, E66.0, E66.01, E66.09, E66.1, E66.2, E66.8, E66.9, E88.81, K95.89, Z68.41, Z68.42, Z68.43, Z68.44, Z98.84                                                                                                                                                                                                                                                            |
| Minimally invasive gastric bypass               | 43644                                                         | 278, 278.01                                                                                                                                                                                                                                            | E66, E66.0, E66.01, E66.09, E66.1, E66.2, E66.3, E66.8, E66.9, E88.81, Z68.41, Z68.42, Z68.43, Z98.84                                                                                                                                                                                                                                                                     |

|                                    |                                   |                                         |                                                                                                                                                                      |
|------------------------------------|-----------------------------------|-----------------------------------------|----------------------------------------------------------------------------------------------------------------------------------------------------------------------|
| Minimally invasive cholecystectomy | 47562, 47563                      |                                         | K80.x, K81.x, K82.x                                                                                                                                                  |
| Minimally invasive fundoplication  | 43280                             |                                         | K21.x, K44.x                                                                                                                                                         |
| Parathyroidectomy                  | 60500, 60502                      | 227.1, 252, 252.01                      | D35.1, E21.x, E83.52, N25.81                                                                                                                                         |
| Thyroid lobectomy                  | 60200, 60210, 60220               | 193, 237.4, 239.7, 234.8, 199.1, 258.02 | C73, C80.1, D44.x, D49.7, D09.3, E04.x, E05.x, E06.x, E07.x, E31.22                                                                                                  |
| Total thyroidectomy                | 60240, 60252, 60254, 60260, 60271 |                                         | C73, C80.1, D09.3, D44.x, D49.7, E04.x, E05.x, E06.x, E07.x, E31.22                                                                                                  |
| Minimally invasive adrenalectomy   | 60650                             | 194, 194.0, 198.7, 237.2, 239.7         | C74, C74.00, C74.01, C74.02, C74.10, C74.11, C74.12, C74.91, C74.92, C79.7, C79.70, C79.71, C79.72, D35.x, D44.1, D44.10, D44.11, D44.12, D49.7, E24.x, E26.x, E27.x |

ICD-9-CM, International Classification of Diseases, Clinical Modification, Ninth Revision; ICD-10-CM, International Classification of Diseases, Clinical Modification, Tenth Revision, CPT, Current Procedural Terminology

\*Although ICD-10-CM was implemented in the ACS-NSQIP Participant User File from 2016, six procedures (minimally invasive colectomy for cancer, minimally invasive sleeve gastrectomy, minimally invasive gastric bypass, parathyroidectomy, thyroid lobectomy, and minimally invasive adrenalectomy) additionally utilized ICD-9-CM diagnosis codes in 2016. In order to capture these procedures, both ICD-9-CM and ICD-10-CM codes were used for these six procedures in 2016 only. For the years 2017-2020 only ICD-10-CM codes were used for all procedures.

**eTable 2.** Sensitivity Analysis of Odds of Undergoing Outpatient General Surgery Procedures During Q2-Q4 of 2020 vs Q2-Q4 of 2019

| Procedure                                       | Years                    | Univariate odds ratio (95% CI) | P value | Adjusted odds ratio (95% CI) <sup>a</sup> | P value |
|-------------------------------------------------|--------------------------|--------------------------------|---------|-------------------------------------------|---------|
| Minimally invasive colectomy for cancer         | Q2-Q4 2020 vs Q2-Q4 2019 | 1.01 (0.79-1.28)               | 0.97    | 1.01 (0.79-1.29)                          | 0.92    |
| Lumpectomy for cancer                           | Q2-Q4 2020 vs Q2-Q4 2019 | 1.44 (1.30-1.60)               | <0.001  | 1.44 (1.30-1.60)                          | <0.001  |
| Mastectomy for cancer                           | Q2-Q4 2020 vs Q2-Q4 2019 | 2.87 (2.65-3.11)               | <0.001  | 2.94 (2.71-3.18)                          | <0.001  |
| Minimally invasive adrenalectomy                | Q2-Q4 2020 vs Q2-Q4 2019 | 2.63 (1.75-3.96)               | <0.001  | 2.53 (1.67-3.83)                          | <0.001  |
| Thyroid lobectomy for cancer                    | Q2-Q4 2020 vs Q2-Q4 2019 | 1.55 (1.42-1.70)               | <0.001  | 1.54 (1.40-1.69)                          | <0.001  |
| Minimally invasive inguinal hernia repair       | Q2-Q4 2020 vs Q2-Q4 2019 | 1.10 (0.99-1.22)               | 0.07    | 1.11 (0.99-1.23)                          | 0.06    |
| Open inguinal hernia repair                     | Q2-Q4 2020 vs Q2-Q4 2019 | 1.16 (1.07-1.26)               | <0.001  | 1.17 (1.08-1.27)                          | <0.001  |
| Minimally invasive ventral hernia repair        | Q2-Q4 2020 vs Q2-Q4 2019 | 1.23 (1.16-1.30)               | <0.001  | 1.24 (1.17-1.31)                          | <0.001  |
| Open umbilical hernia repair                    | Q2-Q4 2020 vs Q2-Q4 2019 | 1.04 (0.93-1.15)               | 0.53    | 1.04 (0.93-1.16)                          | 0.52    |
| Minimally invasive sleeve gastrectomy           | Q2-Q4 2020 vs Q2-Q4 2019 | 2.82 (2.02-3.93)               | <0.001  | 2.81 (2.01-3.93)                          | <0.001  |
| Minimally invasive gastric bypass               | Q2-Q4 2020 vs Q2-Q4 2019 | 1.27 (0.69-2.35)               | 0.45    | 1.23 (0.66-2.30)                          | 0.52    |
| Parathyroidectomy                               | Q2-Q4 2020 vs Q2-Q4 2019 | 1.27 (1.16-1.40)               | <0.001  | 1.30 (1.19-1.44)                          | <0.001  |
| Minimally invasive cholecystectomy              | Q2-Q4 2020 vs Q2-Q4 2019 | 0.93 (0.90-0.96)               | <0.001  | 0.93 (0.90-0.97)                          | <0.001  |
| Minimally invasive fundoplication               | Q2-Q4 2020 vs Q2-Q4 2019 | 1.32 (1.00-1.73)               | 0.05    | 1.30 (0.98-1.71)                          | 0.07    |
| Minimally invasive colectomy for benign disease | Q2-Q4 2020 vs Q2-Q4 2019 | 1.36 (0.76-2.44)               | 0.30    | 1.51 (0.83-2.73)                          | 0.18    |
| Total thyroidectomy for cancer                  | Q2-Q4 2020 vs Q2-Q4 2019 | 1.65 (1.51-1.79)               | <0.001  | 1.67 (1.53-1.82)                          | <0.001  |

Abbreviations: CI, confidence interval

<sup>a</sup>Covariates adjusted for in multivariable logistic regression models included: American Society of Anesthesiologists class, age, smoking status, sex, and body mass index.
