# Supplementary material for: Performance of General Surgical Procedures in Outpatient Settings Before and After Onset of the COVID-19 Pandemic
Source: PubMed Central journal article supplement (PMC9982689; doi:10.1001/jamanetworkopen.2023.1198), 2023-03-02
Supplement: jamanetwopen-e231198-s002.pdf [file jamanetwopen-e231198-s002.pdf]

## Data Sharing Statement

Shariq. Performance of General Surgical Procedures in Outpatient Settings Before and After Onset of the COVID-19 Pandemic. *JAMA Netw Open*. Published March 02, 2023.

doi:10.1001/jamanetworkopen.2023.1198

### Data

**Data available:** No

### Additional Information

**Explanation for why data not available:** The national database used in this study does not allow for this however participating institutions can repeat the analysis using the same methodology as in the manuscript.
